# Supplementary material
Source: PubMed Central journal article supplement (PMC2430373)
Supplement: 0803558105_Supplemental_PDF.pdf [file 0803558105_Supplemental_PDF.pdf]

# Supporting Information

Edwards *et al.* 10.1073/pnas.0803558105

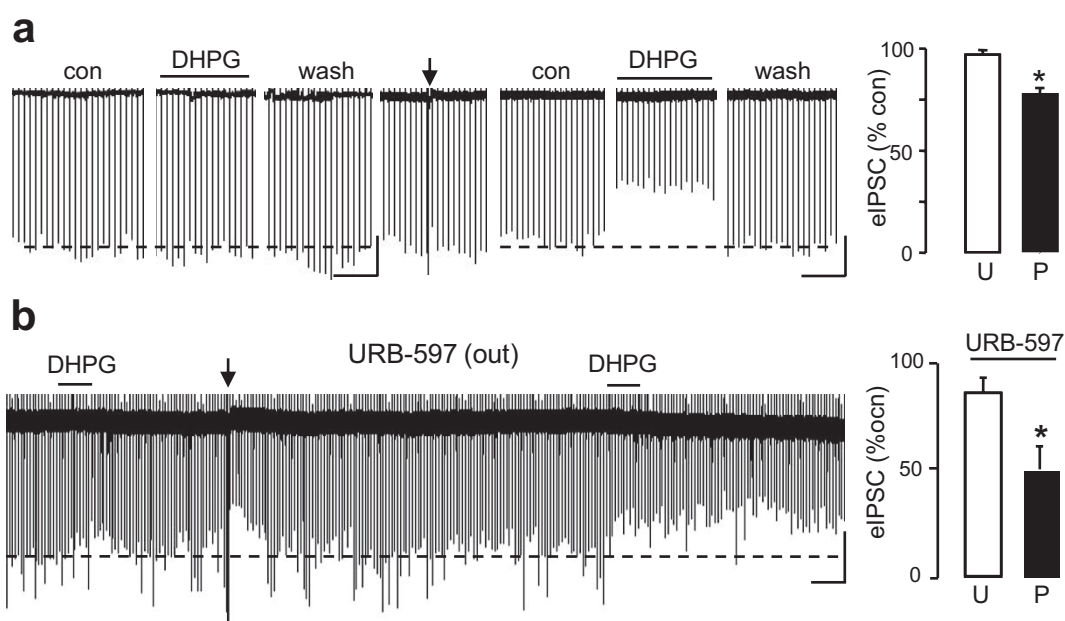

**Fig. S1.** DSI primes  $eCB_{mGluR}$  induced by lower DHPG concentration. (a) DSI primed  $eCB_{mGluR}$  in response to  $10 \mu M$  DHPG. [Scale bars: 30 s/250 pA (first period), 30 s/300 pA (second).] Group data for a show that eIPSCs were not reduced ( $97.0 \pm 2.6\%$  of baseline) before DSI, but after the DSI step they were reduced to  $77.0 \pm 3.85\%$  of baseline ( $P < 0.001$ , paired  $t$  test,  $n = 10$ ). (b) URB-597,  $1 \mu M$  (present throughout) did not prevent priming of  $50 \mu M$  DHPG reduction of eIPSCs. (Scale bars: 1 min/300 pA.) Group data for b show eIPSC suppression to  $85.8 \pm 7.01\%$  of baseline before a DSI trial and to  $50.1 \pm 10.7\%$  afterward ( $P < 0.05$ ,  $n = 4$ ).

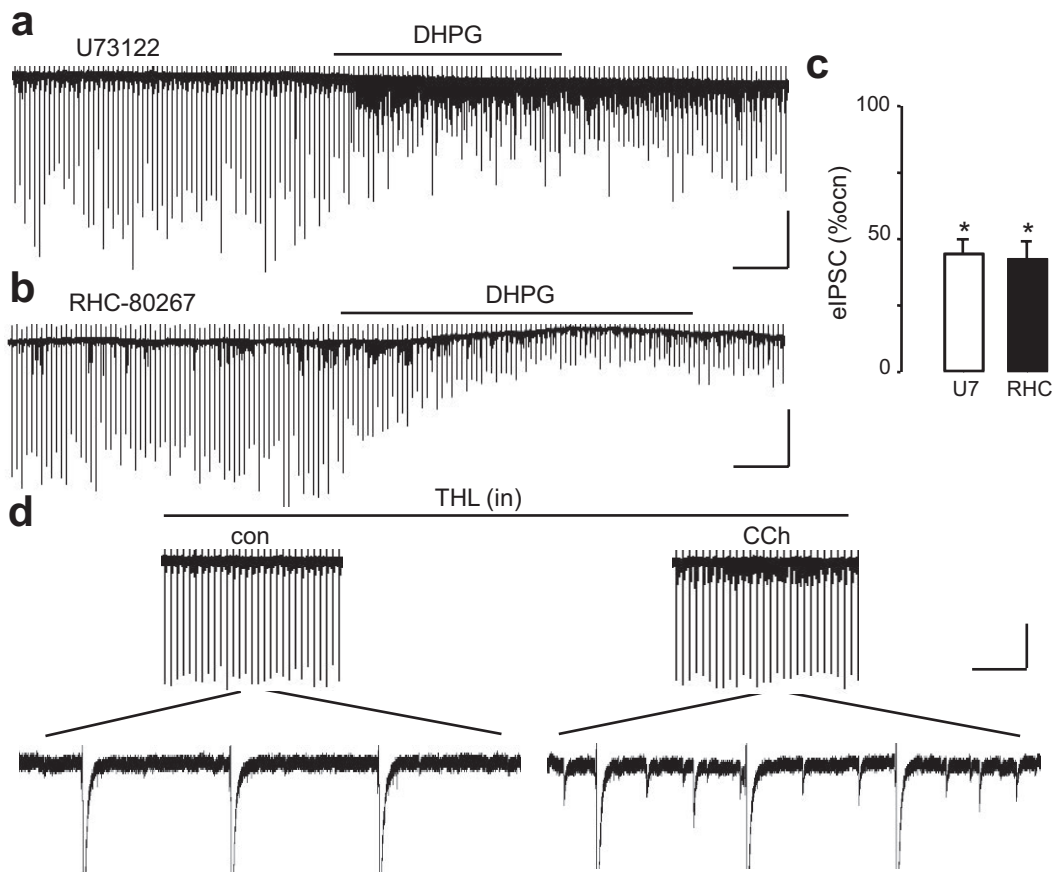

**Fig. S2.** Inhibitors of PLC and DGL do not inhibit priming. (a) Slices were pretreated with U73122 (PLC antagonist, 6 μM; Tocris) or (b) RHC-80267 (DGL antagonist, 70 μM; Sigma) for >1.5 h. The drugs were also included in the bath and in the pipette during the experiment. Cells received one DSI step followed >10 min later by 50 μM DHPG. Example traces show typical eCB<sub>mGluR</sub> responses. [Scale bars: 1 min/400 pA (U73122) and 1 min/500 pA (RHC-80267).] (c) Group data for a and b. eCB<sub>mGluR</sub> for slices treated with U73122 was  $44.3 \pm 5.60\%$  ( $n = 3$ ), and with RHC-80267 it was  $42.4 \pm 6.46\%$  ( $n = 3$ ). (d) THL prevents eCB<sub>mAChR</sub> without affecting the ability of CCh to induce spontaneous IPSC firing, showing that THL does not act as a mAChR antagonist. Lower traces were expanded and amplified to reveal the smaller intervening CCh-induced sIPSCs; the large eIPSCs occurring every 4 s were truncated for display purposes. (Scale bars: 1.5 s/300 pA.)
